# Supplementary material for: Lentinan-functionalized Selenium Nanoparticles target Tumor Cell Mitochondria via TLR4/TRAF3/MFN1 pathway
Source: PubMed Central journal article supplement (PMC7415812; doi:10.7150/thno.46467), 2020-07-11

Supplementary Materials for  
**Lentinan-functionalized selenium nanoparticles target tumor cell mitochondria  
via TLR4/TRAF3/MFN1 pathway**

Hui-Juan Liu<sup>#,1,2\*</sup>, Yuan Qin<sup>1,2\*</sup>, Zi-Han Zhao<sup>1,2\*</sup>, Yang Zhang<sup>4\*</sup>, Jia-Huan Yang<sup>1,2</sup>,  
Deng-Hui Zhai<sup>1,2</sup>, Fang Cui<sup>1,2</sup>, Ce Luo<sup>1</sup>, Man-Xi Lu<sup>1</sup>, Piao-Piao Liu<sup>1</sup>, Heng-Wei Xu<sup>1,2</sup>,  
Kun Li<sup>1,2</sup>, Bo Sun<sup>2</sup>, Shuang Chen<sup>2</sup>, Hong-Gang Zhou<sup>#1</sup>, Cheng Yang<sup>#,1,2</sup>, Tao Sun<sup>#,1,2,3</sup>

<sup>1</sup>State Key Laboratory of Medicinal Chemical Biology and College of Pharmacy,  
Nankai University, Tianjin, China

<sup>2</sup>Tianjin Key Laboratory of Early Druggability Evaluation of Innovative Drugs and  
Tianjin Key Laboratory of Molecular Drug Research, Tianjin International Joint  
Academy of Biomedicine, Tianjin, China

<sup>3</sup>Department of Gastroenterology and Hepatology, General Hospital, Tianjin Medical  
University, Tianjin Institute of Digestive Disease, Tianjin, China.

<sup>4</sup>Department of Anesthesiology, Tianjin Fourth Central Hospital, Tianjin, China

\*These authors have contributed equally to this work

<sup>#</sup>Correspondence to: Tao Sun, email: [tao.sun@nankai.edu.cn](mailto:tao.sun@nankai.edu.cn)

Cheng Yang, email: [cheng.yang@nankai.edu.cn](mailto:cheng.yang@nankai.edu.cn)

Hong-gang Zhou, email: [honggang.zhou@nankai.edu.cn](mailto:honggang.zhou@nankai.edu.cn)

Hui-juan Liu, email: [liuhuijuanxyz@163.com](mailto:liuhuijuanxyz@163.com)

This PDF file includes

Figs. S1-S3

**Figure S1**

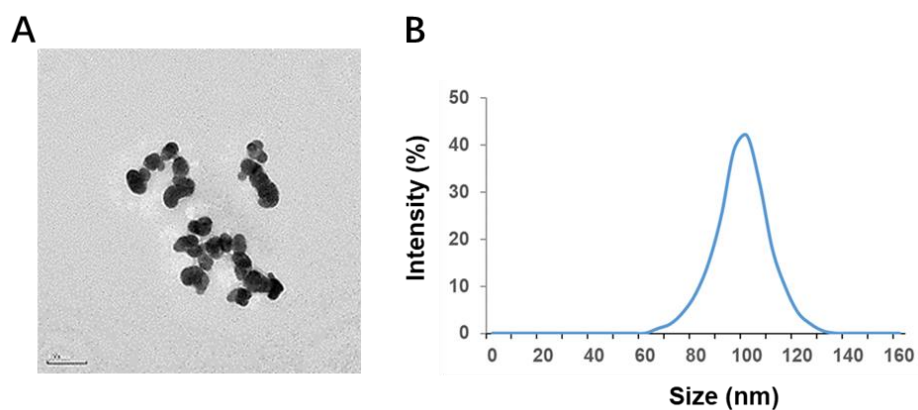

Figure S1. The characterization of SeNPs. (A) The TEM picture of SeNPs; (B) Particle size distribution of SeNPs.

**Figure S2**

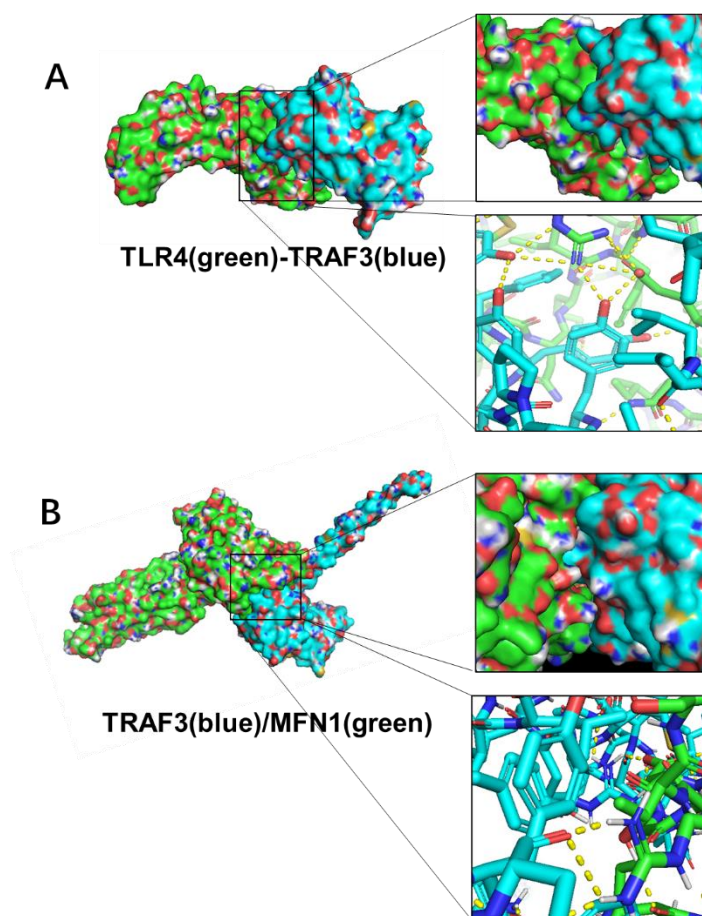

Figure S2. The molecular docking results of TLR4/TRAF3 (A) and TLR4/TRAF3 (B)

(<https://cluspro.org/>).

**Figure S3. The uncropped whole membrane western blot for Figure 4J, Figure 5G, Figure 6F, and Figure 6G.**

Figure. 4J

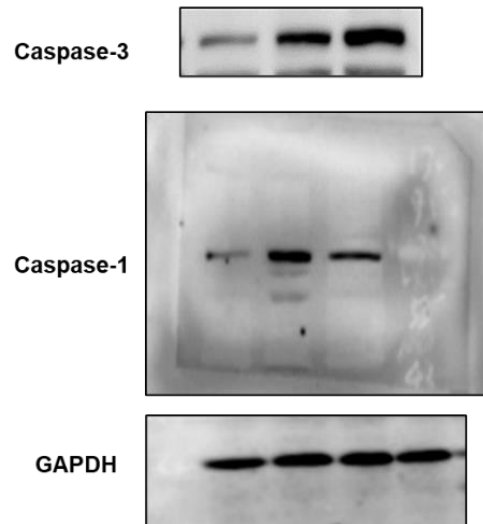

Figure. 5G

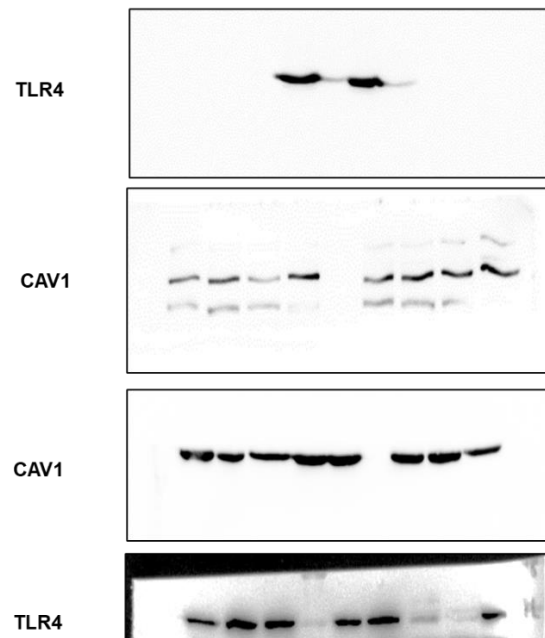

Figure. 6F

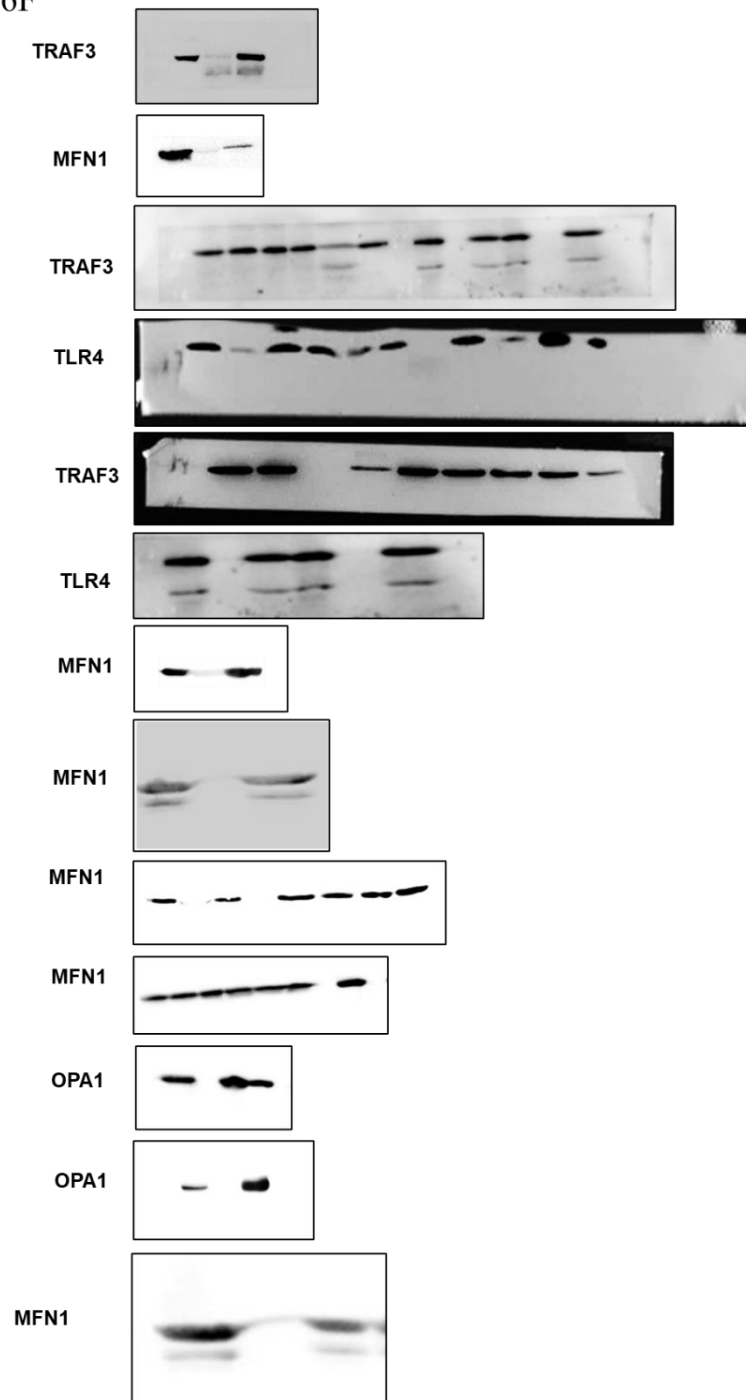

Supplement: thnov10p9083s1.pdf [file thnov10p9083s1.pdf]
